# Supplementary material for: Synoptic and Seasonal Variability of Small River Plumes in the Northeastern Part of the Black Sea
Source: MDPI journal article supplement (doi:10.3390/w15040721), 2023-02-11
Supplement: s1 [file s1]

Archive with 1 entries (1 files):
- water-2207050-supplementary.pdf
